# Supplementary material for: Uncovering the Anti-Lung-Cancer Mechanisms of the Herbal Drug FDY2004 by Network Pharmacology
Source: Hindawi journal article supplement (doi:10.1155/2021/6644018), 2021-02-04
Supplement: f1 [file 6644018.f1.pdf]

# Supplementary Materials

## Uncovering the anti-lung cancer mechanisms of the herbal drug FDY2004 by network pharmacology

Ho-Sung Lee<sup>1,2</sup>, In-Hee Lee<sup>1</sup>, Kyungrae Kang<sup>2</sup>, Sang-In Park<sup>3</sup>,

Tae-Wook Kwon<sup>2</sup>, and Dae-Yeon Lee<sup>1,2</sup>.

<sup>1</sup>The Fore, 87 Ogeum-ro, Songpa-gu, Seoul 05542, Republic of Korea.

<sup>2</sup>Forest Hospital, 129 Ogeum-ro, Songpa-gu, Seoul 05549, Republic of Korea.

<sup>3</sup>Forestheal Hospital, 173 Ogeum-ro, Songpa-gu, Seoul 05641, Republic of Korea.

Correspondence should be addressed to Dae-Yeon Lee; foresthrnd@gmail.com

## Supplementary Figures

|                            | Category           | Term name                                                     | Count    | Percent [%] | p-value  |
|----------------------------|--------------------|---------------------------------------------------------------|----------|-------------|----------|
| Gene ontology              | Biological process | Cellular response to chemical stimulus                        | 101      | 2.95        | 1.93E-39 |
|                            |                    | Cellular response to chemical stress                          | 27       | 7.34        | 1.25E-15 |
|                            |                    | Cellular response to cytokine stimulus                        | 43       | 3.76        | 1.74E-15 |
|                            |                    | Cellular response to growth factor stimulus                   | 21       | 2.87        | 4.45E-04 |
|                            |                    | Cellular response to radiation                                | 14       | 7.25        | 6.53E-07 |
|                            |                    | Cellular response to stimulus                                 | 117      | 1.50        | 9.93E-20 |
|                            |                    | Cytokine-mediated signaling pathway                           | 37       | 4.57        | 1.54E-15 |
|                            |                    | Integrated stress response signaling                          | 4        | 18.18       | 4.58E-02 |
|                            |                    | Lymphocyte activation                                         | 19       | 2.45        | 1.82E-02 |
|                            |                    | Lymphocyte differentiation                                    | 13       | 3.46        | 1.52E-02 |
|                            |                    | Regulation of angiogenesis                                    | 16       | 3.88        | 2.69E-04 |
|                            |                    | Regulation of apoptotic process                               | 63       | 3.92        | 2.56E-26 |
|                            |                    | Regulation of apoptotic signaling pathway                     | 25       | 6.01        | 3.09E-12 |
|                            |                    | Regulation of catabolic process                               | 24       | 2.31        | 3.01E-03 |
|                            |                    | Regulation of catalytic activity                              | 59       | 2.46        | 6.18E-14 |
|                            |                    | Regulation of cell death                                      | 67       | 3.80        | 1.04E-27 |
|                            |                    | Regulation of cell growth                                     | 15       | 3.55        | 2.07E-03 |
|                            |                    | Regulation of cell migration                                  | 37       | 3.73        | 1.09E-12 |
|                            |                    | Regulation of cell motility                                   | 38       | 3.61        | 1.17E-12 |
|                            |                    | Regulation of cell population proliferation                   | 55       | 3.09        | 3.85E-17 |
|                            |                    | Regulation of cellular localization                           | 24       | 2.39        | 1.62E-03 |
|                            |                    | Regulation of cellular response to oxidative stress           | 7        | 7.37        | 1.84E-02 |
|                            |                    | Regulation of cellular response to stress                     | 25       | 3.19        | 3.17E-06 |
|                            |                    | Regulation of cytokine production                             | 23       | 2.76        | 2.19E-04 |
|                            |                    | Regulation of immune response                                 | 23       | 2.26        | 7.20E-03 |
|                            |                    | Regulation of immune system process                           | 44       | 2.67        | 1.86E-10 |
|                            |                    | Regulation of inflammatory response                           | 23       | 5.30        | 6.66E-10 |
|                            |                    | Regulation of kinase activity                                 | 28       | 3.04        | 8.36E-07 |
|                            |                    | Regulation of leukocyte adhesion to vascular endothelial cell | 7        | 18.42       | 3.04E-05 |
|                            |                    | Regulation of leukocyte cell-cell adhesion                    | 19       | 5.65        | 2.96E-08 |
|                            |                    | Regulation of leukocyte differentiation                       | 14       | 4.76        | 1.44E-04 |
|                            |                    | Regulation of metabolic process                               | 95       | 1.31        | 6.28E-08 |
|                            |                    | Regulation of programmed cell death                           | 65       | 3.98        | 8.24E-28 |
|                            |                    | Regulation of response to oxidative stress                    | 7        | 6.73        | 3.34E-02 |
|                            |                    | Regulation of response to stimulus                            | 84       | 1.91        | 5.69E-16 |
|                            |                    | Regulation of response to stress                              | 46       | 2.98        | 7.02E-13 |
|                            |                    | Regulation of signal transduction                             | 71       | 2.19        | 2.10E-15 |
|                            |                    | Regulation of signaling                                       | 76       | 2.05        | 2.22E-15 |
|                            |                    | Reponse to chemical                                           | 113      | 2.35        | 1.82E-37 |
|                            |                    | Reponse to cytokine                                           | 46       | 3.72        | 1.18E-16 |
| Reponse to drug            | 27                 | 6.44                                                          | 3.42E-14 |             |          |
| Reponse to growth factor   | 21                 | 2.77                                                          | 8.26E-04 |             |          |
| Reponse to radiation       | 28                 | 6.03                                                          | 4.45E-14 |             |          |
| Reponse to stimulus        | 124                | 1.31                                                          | 7.20E-17 |             |          |
| Reponse to toxic substance | 13                 | 5.20                                                          | 1.56E-04 |             |          |

|                                   | Category            | Term name                                              | Count    | Percent [%] | p-value  |
|-----------------------------------|---------------------|--------------------------------------------------------|----------|-------------|----------|
| Gene ontology                     | Cellular components | Cell surface                                           | 24       | 2.64        | 1.83E-05 |
|                                   |                     | Chromatin                                              | 22       | 1.75        | 4.57E-02 |
|                                   |                     | Cytoplasm                                              | 113      | 0.96        | 1.12E-03 |
|                                   |                     | Cytosol                                                | 61       | 1.17        | 1.28E-02 |
|                                   |                     | Death-inducing signaling complex                       | 3        | 33.33       | 9.92E-03 |
|                                   |                     | Endoplasmic reticulum                                  | 37       | 2.01        | 3.84E-06 |
|                                   |                     | Extracellular matrix                                   | 14       | 2.53        | 2.01E-02 |
|                                   |                     | Extracellular region                                   | 56       | 1.22        | 9.27E-03 |
|                                   |                     | Membrane region                                        | 12       | 3.51        | 2.95E-03 |
|                                   |                     | Nucleoplasm                                            | 49       | 1.22        | 4.29E-02 |
|                                   |                     | Organelle                                              | 127      | 0.91        | 2.44E-04 |
|                                   |                     | Plasma membrane                                        | 65       | 1.15        | 9.60E-03 |
|                                   |                     | Protein-containing complex                             | 63       | 1.14        | 1.77E-02 |
|                                   |                     | Transcription regulator complex                        | 13       | 2.91        | 9.09E-03 |
|                                   | Vesicle             | 54                                                     | 1.34     | 8.84E-04    |          |
|                                   | Molecular function  | Catalytic activity                                     | 96       | 1.63        | 3.39E-16 |
|                                   |                     | Drug binding                                           | 7        | 6.86        | 8.59E-03 |
|                                   |                     | Enzyme binding                                         | 55       | 2.41        | 3.71E-13 |
|                                   |                     | Hormone binding                                        | 6        | 6.98        | 3.34E-02 |
|                                   |                     | Kinase activity                                        | 23       | 2.85        | 2.86E-05 |
|                                   |                     | Kinase binding                                         | 22       | 2.91        | 3.88E-05 |
|                                   |                     | Ligand-activated transcription factor activity         | 9        | 20.45       | 2.47E-08 |
|                                   |                     | Molecular transducer activity                          | 26       | 1.76        | 2.88E-02 |
|                                   |                     | Nuclear receptor activity                              | 9        | 20.45       | 2.47E-08 |
|                                   |                     | Phosphatase binding                                    | 13       | 6.63        | 2.20E-06 |
|                                   |                     | Signaling receptor activity                            | 26       | 1.76        | 2.88E-02 |
|                                   |                     | Signaling receptor binding                             | 35       | 2.09        | 1.49E-05 |
|                                   |                     | Small molecule binding                                 | 49       | 1.90        | 1.98E-07 |
| Steroid hormone receptor activity |                     | 9                                                      | 16.36    | 2.07E-07    |          |
| Transcription factor binding      | 28                  | 3.97                                                   | 3.14E-10 |             |          |
| Pathway                           | KEGG                | Apoptosis                                              | 13       | 9.56        | 2.00E-05 |
|                                   |                     | Cellular senescence                                    | 11       | 7.05        | 3.31E-03 |
|                                   |                     | EGFR tyrosine kinase inhibitor resistance              | 11       | 13.92       | 3.67E-06 |
|                                   |                     | ErbB signaling pathway                                 | 8        | 9.52        | 4.78E-03 |
|                                   |                     | Estrogen signaling pathway                             | 11       | 8.03        | 9.77E-04 |
|                                   |                     | Focal adhesion                                         | 13       | 6.50        | 1.53E-03 |
|                                   |                     | HIF-1 signaling pathway                                | 12       | 11.01       | 1.26E-05 |
|                                   |                     | MAPK signaling pathway                                 | 17       | 5.78        | 3.57E-04 |
|                                   |                     | Non-small cell lung cancer                             | 9        | 13.24       | 1.02E-04 |
|                                   |                     | p53 signaling pathway                                  | 8        | 10.96       | 1.71E-03 |
|                                   |                     | Pathways in cancer                                     | 39       | 7.37        | 1.17E-14 |
|                                   |                     | PD-L1 expression and PD-1 checkpoint pathway in cancer | 11       | 12.36       | 1.29E-05 |
|                                   |                     | PI3K-Akt signaling pathway                             | 22       | 6.23        | 3.03E-06 |
|                                   |                     | Platinum drug resistance                               | 9        | 12.50       | 1.67E-04 |
|                                   |                     | Ras signaling pathway                                  | 14       | 6.06        | 1.59E-03 |
|                                   |                     | Small cell lung cancer                                 | 10       | 10.87       | 1.63E-04 |
|                                   |                     | TNF signaling pathway                                  | 17       | 15.18       | 1.38E-10 |
| VEGF signaling pathway            | 8                   | 13.56                                                  | 3.40E-04 |             |          |

**Supplementary Figure S1. Functional enrichment analysis for the lung cancer-related targets of FDY2004.**

## Supplementary Tables

**Supplementary Table S1. General information and reports on evidence of biological activities of FDY2004 and its herbal constituents**

|                  | Herbal medicines                                                                                                  |                                                                                  |                                                                                             |                              |
|------------------|-------------------------------------------------------------------------------------------------------------------|----------------------------------------------------------------------------------|---------------------------------------------------------------------------------------------|------------------------------|
|                  | Moutan Radicis Cortex                                                                                             | Persicae Semen                                                                   | Rhei Radix et Rhizoma                                                                       | FDY2004                      |
| Scientific name  | <i>Paeonia suffruticosa</i><br>Andrews                                                                            | <i>Prunus persica</i> Batsch                                                     | <i>Rheum palmatum</i> Linné                                                                 | -                            |
| Vernacular name  | <i>Mudanpi</i>                                                                                                    | <i>Taoren</i>                                                                    | <i>Dahuang</i>                                                                              | -                            |
| Species          | Paeoniaceae                                                                                                       | Rosaceae                                                                         | Rheum                                                                                       | -                            |
| Traditional uses | Treatment for allergic diseases, atherosclerosis, cutaneous diseases, diabetes, infection, and inflammation [1-4] | Treatment for dysmenorrhea, endometriosis, hypermenorrhea, and infertility [5-8] | Treatment for abdominal pain, constipation, fever, and intense and profuse sweating [9, 10] | -                            |
| Parts used       | Root barks                                                                                                        | Dried ripe seed                                                                  | Dried root and rhizome                                                                      | -                            |
| Collection site  | China                                                                                                             | Republic of South Africa                                                         | China                                                                                       | -                            |
| Yield            | -                                                                                                                 | -                                                                                | -                                                                                           | 19.07 ± 2.14 % (w/w)<br>[11] |

---

|                       |                                                                                                                                                                                   |                                                                                                   |                                                                                                                           |                                            |
|-----------------------|-----------------------------------------------------------------------------------------------------------------------------------------------------------------------------------|---------------------------------------------------------------------------------------------------|---------------------------------------------------------------------------------------------------------------------------|--------------------------------------------|
| Biological activities | Analgesic, anti-allergic, anticancer, antidiabetic, anti-inflammatory, anti-oxidative, antipyretic, hepatoprotective, immunomodulatory, and neuroprotective activities [4, 12-14] | Anti-allergic, anticancer, antidiabetic, anti-inflammatory, and anti-oxidative activities [15-20] | Anticancer, anti-fibrotic, anti-inflammatory, anti-oxidative, and gastrointestinal function regulatory activities [21-23] | Anticancer and antioxidant activities [11] |
|-----------------------|-----------------------------------------------------------------------------------------------------------------------------------------------------------------------------------|---------------------------------------------------------------------------------------------------|---------------------------------------------------------------------------------------------------------------------------|--------------------------------------------|

---

**Supplementary Table S2. Chemical components of FDY2004.**

| Herbal medicines | Chemical compounds                                                         | OB    | Caco-2 | DL   |
|------------------|----------------------------------------------------------------------------|-------|--------|------|
| MRC              | (+)-Catechin                                                               | 54.83 | -0.03  | 0.24 |
| MRC              | 5-[[5-(4-methoxyphenyl)-2-furyl]methylene]barbituric acid<br>{ZINC9320615} | 43.44 | 0.09   | 0.3  |
| MRC              | Caffeic acid                                                               | 25.76 | 0.21   | 0.05 |
| MRC              | Kaempferol                                                                 | 41.88 | 0.26   | 0.24 |
| MRC              | Mairin                                                                     | 55.38 | 0.73   | 0.78 |
| MRC              | Paeoniflorin                                                               | 10.22 | -1.69  | 0.79 |
| MRC              | Paeoniflorin_qt                                                            | 68.18 | -0.34  | 0.4  |
| MRC              | Paeonol                                                                    | 28.79 | 0.93   | 0.04 |
| MRC              | Pentagalloylglucose                                                        | 3.01  | -3.08  | 0.21 |
| MRC              | Quercetin                                                                  | 46.43 | 0.05   | 0.28 |
| MRC              | (1R)-()-Nopinone                                                           | 57.86 | 1.23   | 0.05 |
| MRC              | 1-(2,3-dihydroxy-4-methoxyphenyl)ethanone                                  | 32.96 | 0.81   | 0.05 |

|     |                                                                                                                                                   |        |       |      |
|-----|---------------------------------------------------------------------------------------------------------------------------------------------------|--------|-------|------|
| MRC | 3-[(2S,3R,4S,5S,6R)-6-[[[(2R,3R,4R)-3,4-dihydroxy-4-(hydroxymethyl)oxolan-2-yl]oxymethyl]-3,4,5-trihydroxyoxan-2-yl]oxy-4,5-dihydroxybenzoic acid | 5.6    | -2.54 | 0.63 |
| MRC | 3-acetyl-4-hydroxybenzoic acid                                                                                                                    | 37.58  | -0.04 | 0.05 |
| MRC | 3-Hydroxy-4-methoxyacetophenone                                                                                                                   | 22.32  | 0.85  | 0.04 |
| MRC | 4-O-Methylpaeoniflorin                                                                                                                            | 25.71  | -1.27 | 0.78 |
| MRC | 4-O-Methylpaeoniflorin_qt                                                                                                                         | 67.24  | 0.15  | 0.43 |
| MRC | 6-Hydroxycoumarin                                                                                                                                 | 15.8   | 0.73  | 0.05 |
| MRC | 6-o-vanillyoxypaeoniflorin                                                                                                                        | 10.91  | -1.58 | 0.54 |
| MRC | 6-o-vanillyoxypaeoniflorin_qt 2                                                                                                                   | 17.71  | -0.61 | 0.37 |
| MRC | apiopaeonoside                                                                                                                                    | 16.73  | -1.79 | 0.64 |
| MRC | Apocynin                                                                                                                                          | 31.71  | 0.74  | 0.04 |
| MRC | Benzoyl paeoniflorin                                                                                                                              | 31.14  | -1.35 | 0.54 |
| MRC | Beta-D-Apiose                                                                                                                                     | 118.53 | -1.46 | 0.03 |
| MRC | Beta-sitosterol-beta-d-glucoside                                                                                                                  | 19.58  | -0.17 | 0.62 |
| MRC | Beta-sitosterol-beta-d-glucoside_qt                                                                                                               | 25.32  | 1.28  | 0.75 |

|     |                                                    |       |       |      |
|-----|----------------------------------------------------|-------|-------|------|
| MRC | BOX                                                | 31.55 | 0.54  | 0.02 |
| MRC | Sitosterol                                         | 36.91 | 1.32  | 0.75 |
| MRC | Delta 7-stigmastenol                               | 25.32 | 1.31  | 0.75 |
| MRC | DEP                                                | 52.19 | 0.72  | 0.07 |
| MRC | Eugenol                                            | 56.24 | 1.35  | 0.04 |
| MRC | Galloyl-oxypaeoniflorin                            | 3.2   | -2.18 | 0.39 |
| MRC | Galloyl-oxypaeoniflorin Qt 2                       | 26.21 | -0.54 | 0.44 |
| MRC | Hexanoic acid                                      | 73.08 | 0.8   | 0.01 |
| MRC | Methyl salicylate                                  | 42.55 | 1.05  | 0.03 |
| MRC | Mudanoside A                                       | 13.39 | -1.42 | 0.29 |
| MRC | Mudanpinoic,acid,a                                 | 13.86 | 0.6   | 0.65 |
| MRC | Mudanpioside H                                     | 6.77  | -1.63 | 0.61 |
| MRC | Mudanpioside H Qt 2                                | 42.36 | -0.39 | 0.37 |
| MRC | octadecyl (E)-3-(3,4-dihydroxyphenyl)prop-2-enoate | 3.18  | 0.98  | 0.55 |
| MRC | Oleanic acid                                       | 8.41  | 1.14  | 0.77 |



|     |                    |       |       |      |
|-----|--------------------|-------|-------|------|
| MRC | Oleanolic acid     | 29.02 | 0.59  | 0.76 |
| MRC | Oleic acid         | 33.13 | 1.17  | 0.14 |
| MRC | Oxypaeoniflorin    | 12.98 | -1.91 | 0.78 |
| MRC | Oxypaeoniflorin_qt | 19.4  | -0.77 | 0.44 |
| MRC | Paeonidanin        | 24.64 | -1.28 | 0.78 |
| MRC | Paeonidanin_qt     | 65.31 | -0.09 | 0.35 |
| MRC | Paeonolide         | 6.3   | -1.42 | 0.64 |
| MRC | Paeonoside         | 18.52 | -0.86 | 0.24 |
| MRC | PHB                | 30.15 | 0.39  | 0.03 |
| MRC | Trochol            | 15.48 | 0.84  | 0.78 |
| MRC | Vanillic acid      | 35.47 | 0.43  | 0.04 |
| MRC | WLN: QR CQ DV1     | 36.49 | 0.67  | 0.03 |
| PS  | (+)-Epicatechin    | 48.96 | 0.02  | 0.24 |
| PS  | Amygdalin          | 4.42  | -1.91 | 0.61 |
| PS  | Campesterol        | 37.58 | 1.31  | 0.71 |

|    |                                                                                                                            |        |       |      |
|----|----------------------------------------------------------------------------------------------------------------------------|--------|-------|------|
| PS | GA120                                                                                                                      | 84.85  | 0.38  | 0.45 |
| PS | GA121-Isolactone                                                                                                           | 72.7   | -0.26 | 0.54 |
| PS | GA122                                                                                                                      | 64.79  | -0.17 | 0.5  |
| PS | GA122-Isolactone                                                                                                           | 88.11  | -0.18 | 0.54 |
| PS | Gibberellin A119                                                                                                           | 76.36  | -0.12 | 0.49 |
| PS | Gibberellin A44                                                                                                            | 101.61 | -0.13 | 0.54 |
| PS | Gibberellin A7                                                                                                             | 73.8   | -0.18 | 0.5  |
| PS | Hederagenin                                                                                                                | 36.91  | 1.32  | 0.75 |
| PS | $\alpha$ 1-Sitosterol                                                                                                      | 43.28  | 1.41  | 0.78 |
| PS | (2S)-2-phenyl-2-[(2S,3R,4S,5S,6R)-3,4,5-trihydroxy-6-(hydroxymethyl)oxan-2-yl]oxyacetic acid                               | 8.27   | -1.22 | 0.2  |
| PS | (2S,3R,4S,5S,6R)-2-(benzyloxy)-6-methylol-tetrahydropyran-3,4,5-triol                                                      | 17.14  | -0.71 | 0.14 |
| PS | [(2S,3R,4S,5S,6R)-3,4,5-trihydroxy-6-(hydroxymethyl)oxan-2-yl] (E)-3-(4-hydroxyphenyl)prop-2-enoate                        | 9.8    | -1.09 | 0.26 |
| PS | [2-[(2S,3R,4S,5S,6R)-3,4,5-trihydroxy-6-(hydroxymethyl)oxan-2-yl]oxyphenyl]methyl (E)-3-(3,4-dihydroxyphenyl)prop-2-enoate | 8.22   | -1.05 | 0.69 |

|    |                                                                                                        |       |       |      |
|----|--------------------------------------------------------------------------------------------------------|-------|-------|------|
| PS | 2,3-didehydro GA69                                                                                     | 14.28 | -0.17 | 0.5  |
| PS | 2,3-didehydro GA77                                                                                     | 88.08 | -0.67 | 0.53 |
| PS | 2,3-didehydro GA9                                                                                      | 17.03 | 0.37  | 0.45 |
| PS | 24-Methylenecycloartanol                                                                               | 10.4  | 1.42  | 0.79 |
| PS | 3-feruloylquinic acid                                                                                  | 19.31 | -1.01 | 0.36 |
| PS | 3-O-p-coumaroylquinic acid                                                                             | 37.63 | -1.2  | 0.29 |
| PS | 4a-formyl-7alpha-hydroxy-1-methyl-8-methylidene-4aalpha,4bbeta-gibbane-1alpha,10beta-dicarboxylic acid | 88.6  | -0.75 | 0.46 |
| PS | 7-dehydroavenasterol                                                                                   | 10.03 | 1.36  | 0.76 |
| PS | alexandrin                                                                                             | 20.63 | -0.2  | 0.63 |
| PS | Amygdalinic acid                                                                                       | 4.15  | -2.32 | 0.63 |
| PS | Benzyl Beta -gentiobioside                                                                             | 3.46  | -2.07 | 0.56 |
| PS | Benzyl glucopyranoside                                                                                 | 12.39 | -0.7  | 0.14 |
| PS | Beta-D-Glucopyranoside, 2-((benzoyloxy)methyl)-4-hydroxyphenyl                                         | 13.51 | -1.03 | 0.53 |
| PS | Campesterol-3-O-β-D-(6-O-oleyl)glucopyranoside                                                         | 27.03 | 0.04  | 0.17 |

|    |                                                           |       |       |      |
|----|-----------------------------------------------------------|-------|-------|------|
| PS | Campesterol-3-O- $\beta$ -D-(6-O-palmityl)glucopyranoside | 25.65 | 0.02  | 0.19 |
| PS | Campesterol-3-O- $\beta$ -D-glucopyranoside               | 20.49 | -0.22 | 0.67 |
| PS | Campesterol-3-O- $\beta$ -D-glucopyranoside_qt            | 7.86  | 1.29  | 0.72 |
| PS | cis-p-Coumarate                                           | 45.98 | 0.46  | 0.04 |
| PS | D-mandelonitrile                                          | 48.26 | 0.67  | 0.02 |
| PS | EIC                                                       | 41.9  | 1.16  | 0.14 |
| PS | GA118                                                     | 10.41 | -0.6  | 0.53 |
| PS | GA121                                                     | 14.13 | -0.26 | 0.5  |
| PS | GA126                                                     | 11.8  | -0.64 | 0.53 |
| PS | GA16                                                      | 14.26 | -0.63 | 0.53 |
| PS | GA30                                                      | 61.72 | -0.83 | 0.54 |
| PS | GA54                                                      | 64.21 | -0.5  | 0.53 |
| PS | GA60                                                      | 93.17 | -0.79 | 0.53 |
| PS | GA61                                                      | 14.82 | -0.22 | 0.49 |
| PS | GA63                                                      | 65.54 | -0.57 | 0.54 |

|    |                                 |       |       |      |
|----|---------------------------------|-------|-------|------|
| PS | GA69                            | 17.67 | -0.21 | 0.49 |
| PS | GA70                            | 14.04 | -0.23 | 0.49 |
| PS | GA77                            | 87.89 | -0.64 | 0.53 |
| PS | GA87                            | 68.85 | -1.14 | 0.57 |
| PS | GA95                            | 20.01 | -0.24 | 0.49 |
| PS | GA97                            | 10.12 | -0.89 | 0.47 |
| PS | Gibberellin 17                  | 94.64 | -0.87 | 0.49 |
| PS | Grandidentatin                  | 10.56 | -0.9  | 0.54 |
| PS | Heriguard                       | 11.93 | -1.03 | 0.33 |
| PS | Methyl-alpha-D-fructofuranoside | 65.63 | -1.09 | 0.05 |
| PS | MGL                             | 24.46 | -1.13 | 0.05 |
| PS | MNN                             | 48.36 | 0.68  | 0.02 |
| PS | Triolein                        | 27.27 | 0.97  | 0.13 |
| PS | Prunasin                        | 12.61 | -0.79 | 0.18 |
| PS | RMN                             | 43.67 | 0.11  | 0.03 |

|     |                                                                |       |       |      |
|-----|----------------------------------------------------------------|-------|-------|------|
| PS  | Salireposide_qt                                                | 24.3  | 0.63  | 0.12 |
| PS  | WLN: Q1R                                                       | 58.68 | 1.08  | 0.01 |
| PS  | $\beta$ -sitosterol 3-O- $\beta$ -D-(6-O-oleyl)glucopyranoside | 26.94 | -0.02 | 0.16 |
| PS  | $\beta$ -sitosterol-3-(6-palmitoyl)glucopyranoside             | 26.07 | 0.1   | 0.18 |
| RRR | (-)-Catechin                                                   | 49.68 | -0.03 | 0.24 |
| RRR | Aloe-emodin                                                    | 83.38 | -0.12 | 0.24 |
| RRR | Chrysophanol                                                   | 18.64 | 0.62  | 0.21 |
| RRR | Daucosterol {Sitogluside}                                      | 20.18 | 0.09  | 0.69 |
| RRR | Daucosterol_qt                                                 | 35.89 | 1.35  | 0.7  |
| RRR | Emodin                                                         | 24.4  | 0.22  | 0.24 |
| RRR | Eupatin                                                        | 50.8  | 0.53  | 0.41 |
| RRR | Mutatochrome {Citroxanthin}                                    | 48.64 | 1.97  | 0.61 |
| RRR | Palmidin A                                                     | 32.45 | -0.36 | 0.65 |
| RRR | Physcion                                                       | 22.29 | 0.52  | 0.27 |
| RRR | Rhein                                                          | 47.07 | -0.2  | 0.28 |

|     |                                                                                                                                          |       |       |      |
|-----|------------------------------------------------------------------------------------------------------------------------------------------|-------|-------|------|
| RRR | Toralactone                                                                                                                              | 46.46 | 0.86  | 0.24 |
| RRR | Hispidulin                                                                                                                               | 29.95 | 0.47  | 0.27 |
| RRR | Procyanidin B2 3,3'-di-O-gallate                                                                                                         | 42.63 | -1.86 |      |
| RRR | Palmidin B                                                                                                                               | 1.21  | -0.11 | 0.69 |
| RRR | (-)-Epicatechin-pentaacetate                                                                                                             | 8     | -0.59 | 0.77 |
| RRR | (+)-Catechin-pentaacetate                                                                                                                | 27.58 | -0.65 | 0.77 |
| RRR | (9S)-9-[(9R)-2-carboxy-4,5-dihydroxy-10-oxo-9H-anthracen-9-yl]-4,5-dihydroxy-10-oxo-9H-anthracene-2-carboxylic acid                      | 27.75 | -0.91 | 0.57 |
| RRR | [(2R,3R,4S,5R,6R)-3,5-dihydroxy-2-(3,4,5-trihydroxybenzoyl)oxy-6-[(3,4,5-trihydroxybenzoyl)oxymethyl]oxan-4-yl] 3,4,5-trihydroxybenzoate | 3.01  | -2.22 | 0.54 |
| RRR | [(2R,3S,4S,5R,6S)-6-[4-[(Z)-2-(3,5-dihydroxyphenyl)ethenyl]phenoxy]-3,4,5-trihydroxyoxan-2-yl]methyl 3,4,5-trihydroxybenzoate            | 2.69  | -1.17 | 0.73 |
| RRR | [Epicatechin-(48)]5-epicatechin                                                                                                          | 4.02  | -4.48 | 0    |
| RRR | 1,8-dihydroxy-3-methoxy-2,6-dimethyl-9,10-anthraquinone                                                                                  | 5.53  | 0.63  | 0.29 |
| RRR | 10beta-Hydroxy-6beta-isobutyryl furanoeremophilane                                                                                       | 16.94 | 0.88  | 0.29 |
| RRR | 1-Cinnamoyl-3-hydroxy-11-methoxymeliacarpinin                                                                                            | 35.72 | -0.58 | 0.07 |

|     |                                                        |       |       |      |
|-----|--------------------------------------------------------|-------|-------|------|
| RRR | 1-O-Galloyl-glycerol                                   | 63.21 | -0.81 | 0.1  |
| RRR | 1-O-Galloylpedunculagin                                | 38.09 | -2.9  | 0.04 |
| RRR | 2,3-Digalloylglucose                                   | 2.99  | -2.25 | 0.66 |
| RRR | 2-Cinnamoyl-glucose                                    | 17.02 | -0.73 | 0.22 |
| RRR | 2-Methyl cardol                                        | 3.56  | 1.46  | 0.28 |
| RRR | 2-Methyl-5-carboxymethyl-7-hydroxychromanone           | 14.8  | 0.06  | 0.12 |
| RRR | 3,5-Di-O-galloyl-4-O-digalloylquinic acid              | 3.01  | -2.61 | 0.31 |
| RRR | 3-Carboxy-4-hydroxy-phenoxy glucoside                  | 13.85 | -1.44 | 0.22 |
| RRR | 3-Hydroxy-25-norfriedel-3,1(10)-dien-2-one-30-oic acid | 18.4  | 0.41  | 0.78 |
| RRR | 5-[(Z)-2-(3-hydroxy-4-methoxy-phenyl)vinyl]resorcinol  | 76.25 | 0.66  | 0.15 |
| RRR | 5-acetyl-7-hydroxy-2-methyl-chromone                   | 30.25 | 0.37  | 0.1  |
| RRR | 5-Carboxy-7-hydroxy-2-methyl-benzopyran-gamma-one      | 34.4  | 0.14  | 0.11 |
| RRR | Aloeemodin-omega-O-beta-D-glucopyranoside              | 9.04  | -1.34 | 0.81 |
| RRR | Anthraglycoside B                                      | 27.06 | -1.29 | 0.8  |
| RRR | Barolub                                                | 16.29 | 0.88  | 0.22 |



|     |                                                        |       |       |      |
|-----|--------------------------------------------------------|-------|-------|------|
| RRR | Beta-Glucogallin                                       | 17.89 | -1.58 | 0.25 |
| RRR | Chrysophanol glucoside                                 | 20.06 | -1.17 | 0.76 |
| RRR | Chrysophanol-8-O-beta-D-(6'-O-galloyl)-glucopyranoside | 1.92  | -1.48 | 0.69 |
| RRR | Cinnamic acid                                          | 19.68 | 0.91  | 0.03 |
| RRR | cis-Zimtsaeure                                         | 38.19 | 0.91  | 0.03 |
| RRR | Citric acid                                            | 56.22 | -1.11 | 0.05 |
| RRR | DLA                                                    | 44.51 | -0.21 | 0.01 |
| RRR | DMR                                                    | 68.62 | -1.09 | 0.02 |
| RRR | Docosanoate                                            | 15.69 | 1.21  | 0.26 |
| RRR | Emodin-1-O-beta-D-glucopyranoside                      | 44.81 | -1.12 | 0.8  |
| RRR | Emodin-6-glucoside                                     | 16.09 | -1.28 | 0.8  |
| RRR | Emodinanthrone                                         | 24.72 | 0.8   | 0.21 |
| RRR | Gallic acid-3-O-(6'-O-galloyl)-glucoside               | 30.25 | -1.96 | 0.67 |
| RRR | Gallic acid-4-O-(6'-O-galloyl)-glucoside               | 27.06 | -1.82 | 0.67 |
| RRR | Gallocatechin                                          | 2.26  | -0.27 | 0.27 |

|     |                                            |       |       |      |
|-----|--------------------------------------------|-------|-------|------|
| RRR | Glycerite                                  | 7.28  | -4.71 | 0.03 |
| RRR | Laccaic acid D                             | 2.06  | -0.56 | 0.31 |
| RRR | MAE                                        | 65.06 | -0.46 | 0.01 |
| RRR | o-Acetyltoluene                            | 38.96 | 1.47  | 0.02 |
| RRR | OXL                                        | 29.68 | -0.64 | 0.01 |
| RRR | Palmidin C                                 | 2.35  | 0.18  | 0.69 |
| RRR | Physcion-8-O-beta-D-glucopyranoside        | 8.2   | -1.19 | 0.85 |
| RRR | Physcion-9-O-beta-D-glucopyranoside_qt     | 20.3  | 0.56  | 0.3  |
| RRR | Physciendiglucoside                        | 41.65 | -2.64 | 0.63 |
| RRR | Physcione                                  | 19.38 | 0.02  | 0.27 |
| RRR | PIT                                        | 72.29 | 0.64  | 0.13 |
| RRR | Procyanidin B-5,3'-O-gallate {Procyanidin} | 31.99 | -1.61 | 0.32 |
| RRR | RHAPONTIN                                  | 9     | -0.86 | 0.55 |
| RRR | Rhapontisterone                            | 4.39  | -1.84 | 0.82 |
| RRR | Rheidin B                                  | 1.21  | -0.19 | 0.65 |

|     |                   |       |       |      |
|-----|-------------------|-------|-------|------|
| RRR | Rheidin C         | 1.24  | -0.18 | 0.58 |
| RRR | Rhein diglucoside | 2.93  | -2.79 | 0.63 |
| RRR | Rheinoside A      | 0.82  | -3.17 | 0.68 |
| RRR | Rheinoside A_qt   | 26.28 | -1.87 | 0.75 |
| RRR | Rheochrysin       | 18.31 | -1.14 | 0.82 |
| RRR | Rheosmin          | 26.79 | 0.97  | 0.04 |
| RRR | Rheumin           | 9.16  | -0.23 | 0.17 |
| RRR | Sennidin C        | 1.28  | -0.62 | 0.61 |
| RRR | Sennoside A       | 3.34  | -3.7  | 0.08 |
| RRR | Sennoside B       | 3.34  | -3.85 | 0.08 |
| RRR | Sennoside C       | 3.99  | -3.54 | 0.09 |
| RRR | Sennoside D       | 3.99  | -3.48 | 0.09 |
| RRR | Sennoside D_qt    | 61.06 | -0.7  | 0.61 |
| RRR | Sennoside E       | 3.02  | -3.67 | 0.06 |
| RRR | Sennoside E_qt    | 50.69 | -0.74 | 0.61 |

|         |                                             |       |       |      |
|---------|---------------------------------------------|-------|-------|------|
| RRR     | Serotonin                                   | 42.99 | 0.59  | 0.06 |
| RRR     | Strumaroside                                | 20.78 | -0.23 | 0.67 |
| RRR     | Succinic acid                               | 29.62 | -0.44 | 0.01 |
| RRR     | Torachryson-8-O-beta-D-(6'-oxayl)-glucoside | 43.02 | -1.23 | 0.74 |
| RRR     | TPBO                                        | 24.23 | 1.42  | 0.03 |
| RRR     | ZINC04081604                                | 15.23 | 0.88  | 0.44 |
| MRC/RRR | 3,4,5-trihydroxybenzoic acid {Gallic acid}  | 31.69 | -0.09 | 0.04 |
| PS/RRR  | $\beta$ -Sitosterol                         | 36.91 | 1.32  | 0.75 |

---

MRC, Moutan Radicis Cortex; PS, Persicae Semen; RRR, Rhei Radix et Rhizoma; OB, oral bioavailability; Caco-2, Caco-2 cell permeability; DL, drug-likeness score. Synonyms of certain chemical compounds are given in braces { }.

**Supplementary Table S3. Active chemical components of FDY2004.**

| Herbal medicines | Chemical compounds                                                         | OB    | Caco-2 | DL   |
|------------------|----------------------------------------------------------------------------|-------|--------|------|
| MRC              | (+)-Catechin                                                               | 54.83 | -0.03  | 0.24 |
| MRC              | 5-[[5-(4-methoxyphenyl)-2-furyl]methylene]barbituric acid<br>{ZINC9320615} | 43.44 | 0.09   | 0.3  |
| MRC              | Caffeic acid                                                               | 25.76 | 0.21   | 0.05 |
| MRC              | Kaempferol                                                                 | 41.88 | 0.26   | 0.24 |
| MRC              | Mairin                                                                     | 55.38 | 0.73   | 0.78 |
| MRC              | Paeoniflorin                                                               | 10.22 | -1.69  | 0.79 |
| MRC              | Paeonol                                                                    | 28.79 | 0.93   | 0.04 |
| MRC              | Pentagalloylglucose                                                        | 3.01  | -3.08  | 0.21 |
| MRC              | Quercetin                                                                  | 46.43 | 0.05   | 0.28 |
| MRC              | Sitosterol                                                                 | 36.91 | 1.32   | 0.75 |
| PS               | (+)-Epicatechin                                                            | 48.96 | 0.02   | 0.24 |
| PS               | Amygdalin                                                                  | 4.42  | -1.91  | 0.61 |

|     |                           |        |       |      |
|-----|---------------------------|--------|-------|------|
| PS  | Campesterol               | 37.58  | 1.31  | 0.71 |
| PS  | GA120                     | 84.85  | 0.38  | 0.45 |
| PS  | GA121-Isolactone          | 72.7   | -0.26 | 0.54 |
| PS  | GA122                     | 64.79  | -0.17 | 0.5  |
| PS  | GA122-Isolactone          | 88.11  | -0.18 | 0.54 |
| PS  | Gibberellin A119          | 76.36  | -0.12 | 0.49 |
| PS  | Gibberellin A44           | 101.61 | -0.13 | 0.54 |
| PS  | Gibberellin A7            | 73.8   | -0.18 | 0.5  |
| PS  | Hederagenin               | 36.91  | 1.32  | 0.75 |
| PS  | $\alpha$ 1-Sitosterol     | 43.28  | 1.41  | 0.78 |
| RRR | (-)-Catechin              | 49.68  | -0.03 | 0.24 |
| RRR | Aloe-emodin               | 83.38  | -0.12 | 0.24 |
| RRR | Chrysophanol              | 18.64  | 0.62  | 0.21 |
| RRR | Daucosterol {Sitogluside} | 20.18  | 0.09  | 0.69 |
| RRR | Emodin                    | 24.4   | 0.22  | 0.24 |

|         |                                            |       |       |      |
|---------|--------------------------------------------|-------|-------|------|
| RRR     | Eupatin                                    | 50.8  | 0.53  | 0.41 |
| RRR     | Mutatochrome {Citroxanthin}                | 48.64 | 1.97  | 0.61 |
| RRR     | Palmidin A                                 | 32.45 | -0.36 | 0.65 |
| RRR     | Phycion                                    | 22.29 | 0.52  | 0.27 |
| RRR     | Rhein                                      | 47.07 | -0.2  | 0.28 |
| RRR     | Toralactone                                | 46.46 | 0.86  | 0.24 |
| MRC/RRR | 3,4,5-trihydroxybenzoic acid {Gallic acid} | 31.69 | -0.09 | 0.04 |
| PS/RRR  | $\beta$ -Sitosterol                        | 36.91 | 1.32  | 0.75 |

---

MRC, Moutan Radicis Cortex; PS, Persicae Semen; RRR, Rhei Radix et Rhizoma; OB, oral bioavailability; Caco-2, Caco-2 cell permeability; DL, drug-likeness score. Synonyms of certain chemical compounds are given in braces { }.

**Supplementary Table S4. Targets of active chemical components of FDY2004.**

| Herbal medicines | Chemical compounds          | Targets                                                                                                                                                                                                                                                                   |
|------------------|-----------------------------|---------------------------------------------------------------------------------------------------------------------------------------------------------------------------------------------------------------------------------------------------------------------------|
| MRC              | (+)-Catechin                | ALPL*, APOB*, BACE1*, CA1, CA2, CA3, CA4*, CA5A, CA5B, CA6, CA7, CA9*, CA12*, CSF2*, DNMT1*, FUT4*, HMOX1*, KIAA1149, PGD*, PGF*, PON1*, PTGS2*, SLC22A11, SLC47A1                                                                                                        |
| MRC              | Caffeic acid                | ALOX5*, CA1, CA2, CA3, CA5A, CA5B, CA6, CA7, CA9*, CA12*, CA14, MMP1*, MMP2*, MMP9*, NR0B2*, PTPN1*, SLC22A6                                                                                                                                                              |
| MRC              | Kaempferol                  | ABCB1*, ABCC1*, ABCG2*, AHR*, AKR1B1*, ALOX5*, AR*, CA2, CA7, CA12*, CDK1*, CISD1, CTDSP1, CYP1A2*, CYP1B1*, CYP2D6*, DAPK1, ESRRA*, FLT3*, HSD17B1*, HSD17B2*, MPO*, NOX4*, NR1I2*, P4HB, PTPRS, RPS6KA3*, SLC2A1*, TYR*, UGT1A3, UGT1A7*, UGT1A8, UGT1A9*, UGT3A1, XDH* |
| MRC              | Mairin                      | A1CF, AKR1B10*, AMD1, ARHGEF7*, CDCA8*, CPSF4*, CYP2R1, DHPS, EIF2AK2*, EME1, FOLH1*, GPBAR1, HIGD1B, MDM2*, MEX3D, MMAB, MTOR*, POLB*, PTPRN, RAC1*, RNF31, RPS3, S100A8*, SAE1, UBA2*, USF1                                                                             |
| MRC              | Mutatochrome {Citroxanthin} | DRAP1, NR1D2*, RANBP2, RUVBL1*, TJP1*, TPK1, YAP1*                                                                                                                                                                                                                        |
| MRC              | Paeoniflorin                | BLVRA, F13A1*, FRS3, HNRNPR, NUCB1, STRBP*                                                                                                                                                                                                                                |
| MRC              | Paeonol                     | CASP8*, CASP10*, ICAM1*, MTNR1A*, MTNR1B, PTGS2*, TYR*, VCAM1*                                                                                                                                                                                                            |



|     |                     |                                                                                                                                                                                                                                                                                                                                                                                                                                                                                                                                                      |
|-----|---------------------|------------------------------------------------------------------------------------------------------------------------------------------------------------------------------------------------------------------------------------------------------------------------------------------------------------------------------------------------------------------------------------------------------------------------------------------------------------------------------------------------------------------------------------------------------|
| MRC | Pentagalloylglucose | ABCC11*, AMY1A, AMY1B, AMY1C, BACE1*,<br>EGFR*, ESR1*, F10*, HMOX1*, MCL1, NFE2L2*,<br>PTPN1*, PTPN2*, SERPINE1*, SQLE*, TMPRSS11D                                                                                                                                                                                                                                                                                                                                                                                                                   |
| MRC | Quercetin           | ABCB1*, ABCC1*, ABCG2*, AKR1B1*, AKT1*, ALK*, ALOX12*,<br>ALOX15*, ALOX5*, ATP5B, AURKB*, AVPR2*, AXL*, BACE1*, CA1,<br>CA2, CA3, CA4*, CA5A, CA6, CA7, CA9*, CA12*, CA14, CAMK2B,<br>CCR4*, CDK1*, CSNK2A1*, CXCR1*, CYP1A1*, CYP1A2*, CYP1B1*,<br>CYP2C8*, CYP2C9*, DAPK1, DRD4*, EGFR*, ELAVL1*, F2*, FLT3*,<br>GLO1, GPR35, GSK3B*, HCK, HIBCH, HSD17B2*, IGF1R*, KDR*,<br>MAOA*, MCL1, MET*, MMP2*, MMP3*, MMP9*, MMP13*, MPO*,<br>NEK2*, NEK6, NOX4*, NUAK1, P4HB*, PIK3R1, PIM1*, PKN1,<br>PLA2G1B*, PTK2*, PTPRS, PYGL, SLC2A2, STK17B, XDH* |
| MRC | Sitosterol          | CALML3, CYP17A1, DHPS, DRAP1, GPBAR1, HDLBP,<br>LTF*, NPC1L1, NR1D2*, RAC1*, RUVBL1*, USF1                                                                                                                                                                                                                                                                                                                                                                                                                                                           |
| PS  | (+)-Epicatechin     | ALPL, APOB, BACE1, CA1, CA2, CA3, CA4, CA5A, CA5B,<br>CA6, CA7, CA9, CA12, CSF2, DNMT1, FUT4, HMOX1,<br>KIAA1149, PGD*, PGF*, PON1*, PTGS2*, SLC22A11, SLC47A1                                                                                                                                                                                                                                                                                                                                                                                       |
| PS  | Campesterol         | AMD1, ARHGEF7, CALML3, CDCA8, CYP17A1, DHPS,<br>DRAP1, EIF2AK2, GPBAR1, LTF*, MDM2*, MEX3D, MTOR*,<br>NPC1L1, NR1D2*, PTPRN, RAC1*, RPS3, S100A8*, SHBG*,<br>SLC10A1, SRD5A2*, TNNC1, USF1, USP8*                                                                                                                                                                                                                                                                                                                                                    |
| PS  | GA120               | ACBD7, AMD1, CALML3, EIF2AK2, MDM2*,<br>MEX3D, MTOR*, RAC1*, RPS3, S100A8*                                                                                                                                                                                                                                                                                                                                                                                                                                                                           |

|     |                           |                                                                                                                                                                    |
|-----|---------------------------|--------------------------------------------------------------------------------------------------------------------------------------------------------------------|
| PS  | GA121-Isolactone          | ARHGEF7, CPSF4, CYP2R1, DHRS1, EIF2AK2, FOLH1, MDM2*, MEX3D, MMAB, MTOR*, MTRR*, PHO85, PTPRN, RAC1*, RGS18, RPS3                                                  |
| PS  | GA122-Isolactone          | DHRS1, MTRR*, RGS18                                                                                                                                                |
| PS  | Gibberellin A44           | BRD7, DHRS1                                                                                                                                                        |
| PS  | Gibberellin A7            | ACBD7, EIF2AK2*, MDM2*, MEX3D, MTOR*, RAC1*                                                                                                                        |
| PS  | Hederagenin               | F3*, PNP1, PTPN2*                                                                                                                                                  |
| PS  | $\alpha$ 1-Sitosterol     | ACBD7, AMD1, CALML3*, CDCA8*, DHPS, DRAP1, EIF2AK2*, HDLBP, LTF*, MDM2*, MEX3D, MTOR*, NR1D2*, RAC1*, RANBP2, RNF31, RUVBL1*, TNNC1, USF1, USP8*                   |
| RRR | (-)-Catechin              | ALPL*, APOB*, BACE1*, CA1, CA2, CA3, CA4*, CA5A, CA5B, CA6, CA7, CA9*, CA12*, CSF2*, DNMT1*, FUT4*, HMOX1*, KIAA1149, PGD*, PGF*, PON1*, PTGS2*, SLC22A11, SLC47A1 |
| RRR | Aloe-emodin               | CASP3*, CASP8*, CASP9*, EIF2S1, HSP90AA1*, TP53*, UGT1A9*, XBP1*                                                                                                   |
| RRR | Chrysophanol              | NLRP3*, UGT1A9*                                                                                                                                                    |
| RRR | Daucosterol {Sitogluside} | CYP17A1*, NPC1L1, NR1D2*, RUVBL1*                                                                                                                                  |
| RRR | Emodin                    | AKR1B1*, CASP3*, CSNK2A1*, CSNK2B, CXCR4*, CYP1B1*, ERBB2*, ESR1*, ESR2*, LCK*, MCL1, PIM1*, PTP4A3*, TNF*, TP53*, VEGFA*                                          |

|         |                                                 |                                                                                                                                                                  |
|---------|-------------------------------------------------|------------------------------------------------------------------------------------------------------------------------------------------------------------------|
| RRR     | Eupatin                                         | CREB1*, CYP1B1*                                                                                                                                                  |
| RRR     | Phycion                                         | ELANE*, UGT1A9*                                                                                                                                                  |
| RRR     | Rhein                                           | DNM1L*, FTO*, NFKB1*, PPARA*, PPARG*, RELA*,<br>RXRA*, SLC37A4, TPMT*, UCP1, VEGFA*                                                                              |
| MRC/RRR | 3,4,5-trihydroxybenzoic acid<br>{ Gallic acid } | ABCB1*, ATM*, CA1, CA2, CA3, CA4*, CA5A, CA5B, CA6,<br>CA7, CA9*, CA12*, CA14, CASP3*, EIF2AK3*, FUT7*, GATA3*,<br>JUN*, MMP2*, SERPINE1*, TPMT*, TYR*, UGT2B17* |
| PS/RRR  | $\beta$ -Sitosterol                             | ACBD7, CYP17A1*, DHPS, DRAP1, GPBAR1, LTF*,<br>MDM2*, MEX3D, MTOR*, NPC1L1, NR1D2, RAC1*,<br>RANBP2, RUVBL1*, TNNC1, USF1                                        |

---

MRC, Moutan Radicis Cortex; PS, Persicae Semen; RRR, Rhei Radix et Rhizoma; \*, lung cancer-associated targets. Synonyms of certain chemical compounds are given in braces {}.

**Supplementary Table S5. Docking scores between active chemical components of FDY2004 and the lung cancer-associated targets.**

| Chemical compounds | Targets |      |      |          |      |       |        |      |       |      |      |       |
|--------------------|---------|------|------|----------|------|-------|--------|------|-------|------|------|-------|
|                    | AKT1    | EGFR | ESR1 | HSP90AA1 | JUN  | NFKB1 | PIK3R1 | PTK2 | RAC1  | TNF  | TP53 | VEGFA |
| (-)-Catechin       | -5.7    | -7.7 | -7.0 | -6.7     | -5.3 | -6.3  | -6.1   | -6.0 | -8.5  | -6.2 | -7.3 | -6.9  |
| (+)-Catechin       | -6.0    | -7.7 | -7.0 | -6.7     | -5.3 | -6.3  | -6.1   | -6.0 | -9.0  | -6.2 | -7.3 | -6.9  |
| (+)-Epicatechin    | -5.6    | -7.7 | -7.0 | -6.7     | -5.3 | -6.4  | -6.1   | -6.0 | -9.0  | -6.3 | -7.3 | -6.9  |
| Aloe-emodin        | -6.1    | -8.3 | -7.4 | -7.2     | -5.4 | -6.4  | -6.0   | -6.1 | -9.6  | -6.4 | -7.1 | -6.8  |
| Caffeic acid       | -5.2    | -6.5 | -5.1 | -5.8     | -4.6 | -5.3  | -5.0   | -4.8 | -6.8  | -4.9 | -5.8 | -5.5  |
| Campesterol        | -6.0    | -9.4 | -6.4 | -5.7     | -5.8 | -5.8  | -6.0   | -5.9 | -8.3  | -5.6 | -6.2 | -7.9  |
| Chrysophanol       | -5.7    | -8.5 | -7.6 | -7.3     | -5.4 | -6.5  | -5.8   | -6.0 | -9.8  | -6.7 | -7.3 | -7.0  |
| Daucosterol        | -5.3    | -7.2 | -8.1 | -5.1     | -5.8 | -6.9  | -6.0   | -6.7 | -8.8  | -5.9 | -6.6 | -7.9  |
| Emodin             | -6.0    | -8.3 | -7.8 | -7.2     | -5.6 | -6.5  | -5.8   | -6.2 | -10.1 | -6.8 | -7.3 | -7.0  |
| Eupatin            | -5.5    | -8.7 | -6.8 | -6.0     | -5.4 | -6.8  | -5.7   | -6.0 | -9.3  | -6.7 | -6.6 | -7.1  |
| GA120              | -6.9    | -8.2 | -7.3 | -7.4     | -6.7 | -6.5  | -6.7   | -6.2 | -8.4  | -6.1 | -7.1 | -7.5  |
| Gallic acid        | -5.4    | -6.4 | -5.4 | -5.2     | -5.1 | -5.2  | -4.9   | -4.6 | -6.3  | -4.8 | -5.4 | -5.6  |

|                       |      |       |      |      |      |      |      |      |       |      |      |       |
|-----------------------|------|-------|------|------|------|------|------|------|-------|------|------|-------|
| Gibberellin A7        | -6.0 | -7.9  | -7.0 | -7.2 | -6.5 | -6.4 | -6.5 | -6.2 | -8.1  | -6.4 | -6.9 | -7.4  |
| Hederagenin           | -6.5 | -10.0 | -7.9 | -5.0 | -6.6 | -6.5 | -7.5 | -6.9 | -7.7  | -6.5 | -7.4 | -7.8  |
| Kaempferol            | -6.3 | -7.9  | -6.6 | -6.3 | -5.4 | -6.4 | -6.1 | -5.7 | -8.8  | -6.3 | -6.7 | -6.9  |
| Mairin                | -5.0 | -9.8  | -7.9 | -6.5 | -6.8 | -6.5 | -6.8 | -6.7 | -6.8  | -6.6 | -7.8 | -8.3  |
| Mutatochrome          | -6.9 | -5.4  | -7.3 | -6.5 | -7.3 | -7.7 | -7.8 | -7.2 | -10.3 | -6.2 | -7.6 | -9.6  |
| Paeoniflorin          | -6.0 | -8.6  | -7.0 | -6.1 | -6.1 | -6.8 | -6.7 | -7.2 | -8.4  | -5.7 | -6.6 | -7.6  |
| Paeonol               | -5.3 | -5.7  | -5.0 | -5.4 | -3.9 | -4.9 | -4.5 | -4.1 | -6.3  | -4.9 | -5.2 | -5.1  |
| Pentagalloylglucose   | -6.0 | -8.9  | -7.0 | -3.0 | -6.0 | -8.7 | -6.3 | -7.0 | -8.9  | -7.0 | -8.3 | -8.4  |
| Physcion              | -8.1 | -11.2 | -9.9 | -6.3 | -7.8 | -8.8 | -8.0 | -9.1 | -12.7 | -8.3 | -8.8 | -10.4 |
| Quercetin             | -6.4 | -7.9  | -6.5 | -6.1 | -5.4 | -6.6 | -6.3 | -6.1 | -9.3  | -6.5 | -7.0 | -7.2  |
| Rhein                 | -5.4 | -8.7  | -7.6 | -6.7 | -5.6 | -6.8 | -6.1 | -6.2 | -10.2 | -6.4 | -7.3 | -7.1  |
| Sitosterol            | -4.5 | -8.8  | -6.2 | -5.5 | -5.8 | -5.3 | -5.9 | -5.9 | -8.1  | -5.6 | -6.4 | -7.8  |
| $\alpha$ 1-Sitosterol | -4.8 | -9.7  | -6.3 | -6.8 | -6.3 | -5.5 | -5.9 | -5.9 | -7.8  | -5.5 | -7.0 | -8.5  |
| -Sitosterol           | -4.5 | -8.8  | -6.2 | -5.2 | -5.9 | -5.3 | -5.8 | -5.8 | -7.0  | -5.6 | -6.8 | -7.9  |

---

## References

1. M. Zhang, L. Feng, J. Gu, et al. "The attenuation of Moutan Cortex on oxidative stress for renal injury in AGEs-induced mesangial cell dysfunction and streptozotocin-induced diabetic nephropathy rats," *Oxid Med Cell Longev*, vol. 2014, p. 463815.
2. H.S. Choi, H.S. Seo, J.H. Kim, J.Y. Um, Y.C. Shin, and S.G. Ko. "Ethanol extract of paeonia suffruticosa Andrews (PSE) induced AGS human gastric cancer cell apoptosis via fas-dependent apoptosis and MDM2-p53 pathways," *J Biomed Sci*, vol. 19, p. 82.
3. H.S. Kim, A.R. Kim, J.M. Lee, et al. "A mixture of Trachelospermi caulis and Moutan cortex radices extracts suppresses collagen-induced arthritis in mice by inhibiting NF-kappaB and AP-1," *J Pharm Pharmacol*, vol. 64, no. 3, pp. 420-429.
4. S.Y. Zong, Y.Q. Pu, B.L. Xu, T. Zhang, and B. Wang. "Study on the physicochemical properties and anti-inflammatory effects of paeonol in rats with TNBS-induced ulcerative colitis," *Int Immunopharmacol*, vol. 42, pp. 32-38.
5. W. Jia, X. Wang, D. Xu, A. Zhao, and Y. Zhang. "Common traditional Chinese medicinal herbs for dysmenorrhea," *Phytother Res*, vol. 20, no. 10, pp. 819-824.
6. H.Y. Chen, Y.H. Lin, I.H. Su, Y.C. Chen, S.H. Yang, and J.L. Chen. "Investigation on Chinese herbal medicine for primary dysmenorrhea: implication from a nationwide prescription database in Taiwan," *Complement Ther Med*, vol. 22, no. 1, pp. 116-125.
7. H.J. Kim, K.K. Park, W.Y. Chung, S.K. Lee, and K.R. Kim. "Protective Effect of White-fleshed Peach (*Prunus persica* (L.) Batsch) on Chronic Nicotine-induced Toxicity," *J Cancer Prev*, vol. 22, no. 1, pp. 22-32.
8. C. Burks-Wicks, M. Cohen, J. Fallbacher, N.T. R, and F. Wieser. "A Western primer of Chinese herbal therapy in endometriosis and infertility," *Womens Health (Lond)*, vol. 1, no. 3, pp. 447-463.
9. Y.C. Wu, P. Wu, Y.B. Li, T.C. Liu, L. Zhang, and Y.H.J.R.a. Zhou. "Natural deep eutectic solvents as new green solvents to extract anthraquinones from *Rheum palmatum* L," *RSC Adv*, vol. 8, no. 27, pp. 15069-15077.

10. Y. Fan, Z. Niu, C. Xu, L. Yang, and T. Yang. "Protic Ionic Liquids as Efficient Solvents in Microwave-Assisted Extraction of Rhein and Emodin from *Rheum palmatum* L.," *Molecules*, vol. 24, no. 15.
11. I.-H. Lee, H.-S. Lee, K. Kang, et al. "Influence of Decoction Duration of FDY2004 on Its Physicochemical Components and Antioxidant and Antiproliferative Activities," *Nat Prod Commun*, vol. 15, no. 10, p. 1934578X20968437.
12. M.H. Zhang, L. Feng, M.M. Zhu, et al. "The anti-inflammation effect of Moutan Cortex on advanced glycation end products-induced rat mesangial cells dysfunction and High-glucose-fat diet and streptozotocin-induced diabetic nephropathy rats," *J Ethnopharmacol*, vol. 151, no. 1, pp. 591-600.
13. P.K. Fu, C.Y. Yang, T.H. Tsai, and C.L. Hsieh. "Moutan cortex radices improves lipopolysaccharide-induced acute lung injury in rats through anti-inflammation," *Phytomedicine*, vol. 19, no. 13, pp. 1206-1215.
14. Z. Wang, C. He, Y. Peng, F. Chen, and P. Xiao. "Origins, Phytochemistry, Pharmacology, Analytical Methods and Safety of Cortex Moutan (*Paeonia suffruticosa* Andrew): A Systematic Review," *Molecules*, vol. 22, no. 6.
15. G.J. Kim, H.G. Choi, J.H. Kim, S.H. Kim, J.A. Kim, and S.H. Lee. "Anti-allergic inflammatory effects of cyanogenic and phenolic glycosides from the seed of *Prunus persica*," *Nat Prod Commun*, vol. 8, no. 12, pp. 1739-1740.
16. K.H. Seo, S.Y. Choi, Y. Jin, et al. "Antiinflammatory role of *Prunus persica* L. Batsch methanol extract on lipopolysaccharidestimulated glial cells," *Mol Med Rep*, vol. 21, no. 5, pp. 2030-2040.
17. W. Cassiem and M. de Kock. "The anti-proliferative effect of apricot and peach kernel extracts on human colon cancer cells in vitro," *BMC Complement Altern Med*, vol. 19, no. 1, p. 32.
18. T. Fukuda, H. Ito, T. Mukainaka, H. Tokuda, H. Nishino, and T. Yoshida. "Anti-tumor promoting effect of glycosides from *Prunus persica* seeds," *Biol Pharm Bull*, vol. 26, no. 2, pp. 271-273.
19. R. Kant, R.K. Shukla, A.J.I.J.F.R.I.A.S. Shukla, and E. Technology. "A review on Peach (*Prunus persica*): an asset of medicinal phytochemicals," *Int J Res Appl Sci Eng Technol*, vol. 6, no. I.

20. S. Kim, S.Y. Hong, B. Kwon, et al. "Effect of Persicae Semen for Atopic Dermatitis Skin Tissue and Regulate to Inflammation Mediator in Serum," *Korea J Herbol*, vol. 35, no. 4, pp. 51-60.
21. C.S. Shia, S.H. Juang, S.Y. Tsai, et al. "Metabolism and pharmacokinetics of anthraquinones in Rheum palmatum in rats and ex vivo antioxidant activity," *Planta Med*, vol. 75, no. 13, pp. 1386-1392.
22. Z.B. Tan, H.J. Fan, Y.T. Wu, et al. "Rheum palmatum extract exerts anti-hepatocellular carcinoma effects by inhibiting signal transducer and activator of transcription 3 signaling," *J Ethnopharmacol*, vol. 232, pp. 62-72.
23. H. Xiang, J. Zuo, F. Guo, and D. Dong. "What we already know about rhubarb: a comprehensive review," *Chin Med*, vol. 15, p. 88.
